# Supplementary material for: Green synthesis, characterization, and antimicrobial applications of silver nanoparticles as fluorescent nanoprobes for the spectrofluorimetric determination of ornidazole and miconazole
Source: PubMed Central journal article supplement (PMC9741645; doi:10.1038/s41598-022-25830-x), 2022-12-10
Supplement: 41598_2022_25830_MOESM1_ESM.pdf [file 41598_2022_25830_MOESM1_ESM.pdf]

## Supplementary Material

### **Green synthesis, characterization, and antimicrobial applications of silver nanoparticles as fluorescent nanoprobe for the spectrofluorimetric determination of ornidazole and miconazole**

Galal Magdy<sup>1\*</sup>, Eman Aboelkassim<sup>1</sup>, Ramadan A. El-Domany<sup>2</sup>, Fathalla Belal<sup>3</sup>

<sup>1</sup>  
Pharmaceutical Analytical Chemistry Department, Faculty of Pharmacy, Kafrelsheikh University, Kafrelsheikh, P.O. Box 33511, Egypt.

<sup>2</sup> Microbiology and Immunology Department, Faculty of Pharmacy, Kafrelsheikh University, Kafrelsheikh, P.O. Box 33511, Egypt.

<sup>3</sup>  
Pharmaceutical Analytical Chemistry Department, Faculty of Pharmacy, Mansoura University, Mansoura, P.O. Box 35516, Egypt.

**\*Corresponding author:** Galal Magdy

**E-mail address:** galal\_magdy@pharm.kfs.edu.eg

## Supplementary Figures captions

**Fig. S1** Optical images of Ag-NPs under normal light (a) and UV light (b)

**Fig. S2** UV-visible absorption spectrum of AgNO<sub>3</sub> (a) and Ag-NPs (b)

**Fig. S3** Particle size distribution of Ag-NPs using DLS (a) and elemental analysis results of Ag-NPs using EDX (b)

**Fig. S4** Effect of temperature on Ag-NPs

**Fig. S5** Effect of pH (a), volume of Britton-Robinson buffer (b), incubation time (c), and temperature (d) on the relative quenched fluorescence intensity of Ag-NPs by ONZ (20.0 μM) and MIZ (50.0 μM)

**Fig. S6** The response of possible interfering excipients

**Fig. S7** The selectivity of Ag-NPs towards ONZ and MIZ in presence of different metal ions

**Fig. S8** Fluorescence emission spectra of the Ag-NPs in spiked human plasma upon the addition of different concentrations of ONZ (from top to bottom: 0.0, 20.0, 30.0, 40.0 μM)

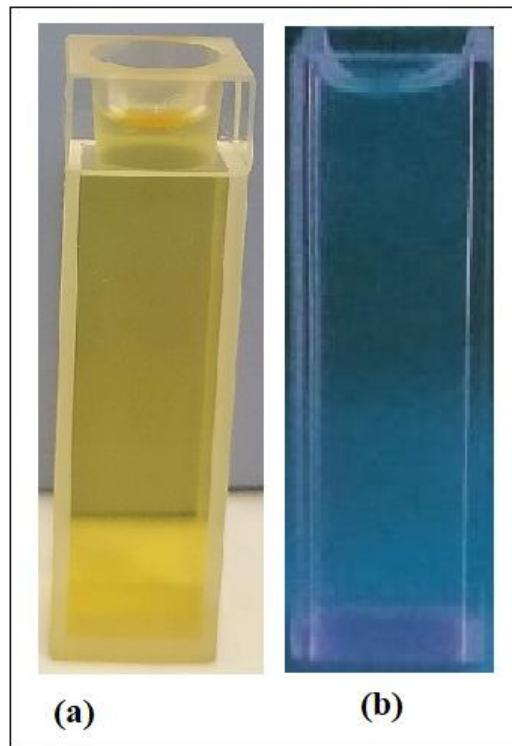

**Fig. S1**

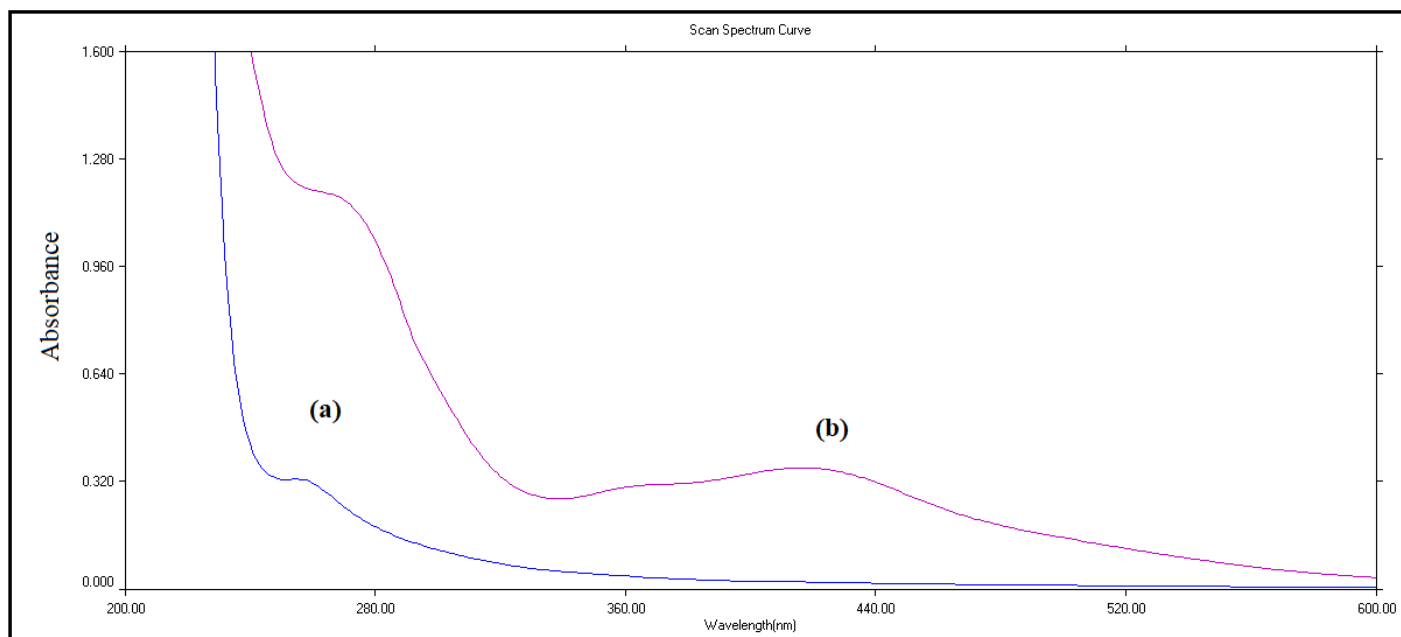

**Fig. S2**

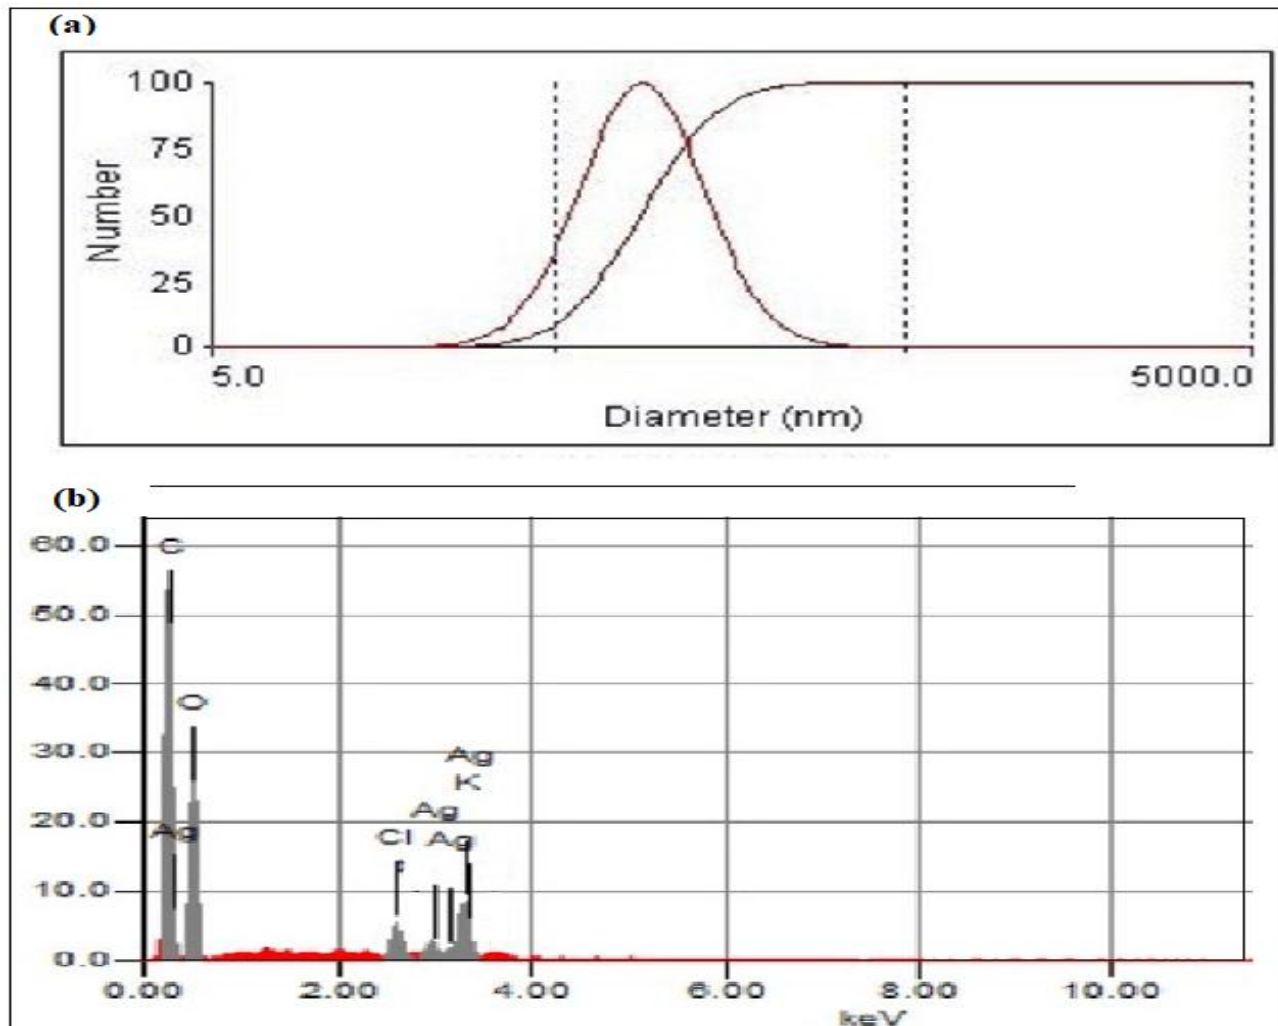

Fig. S3

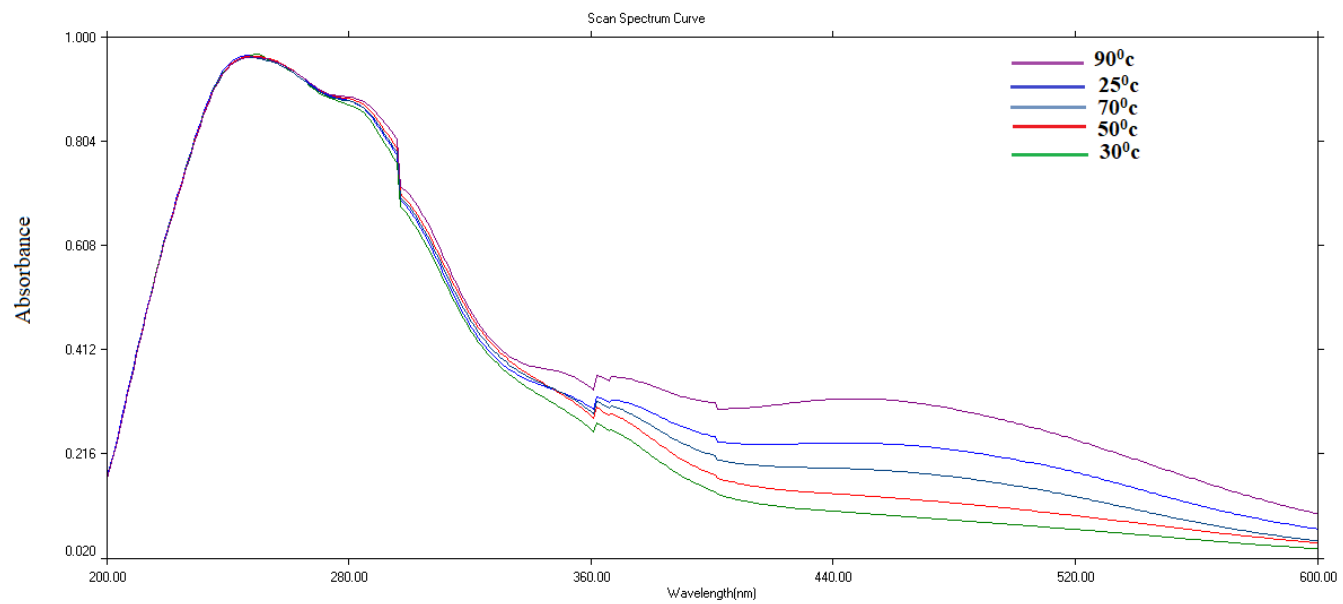

**Fig. S4**

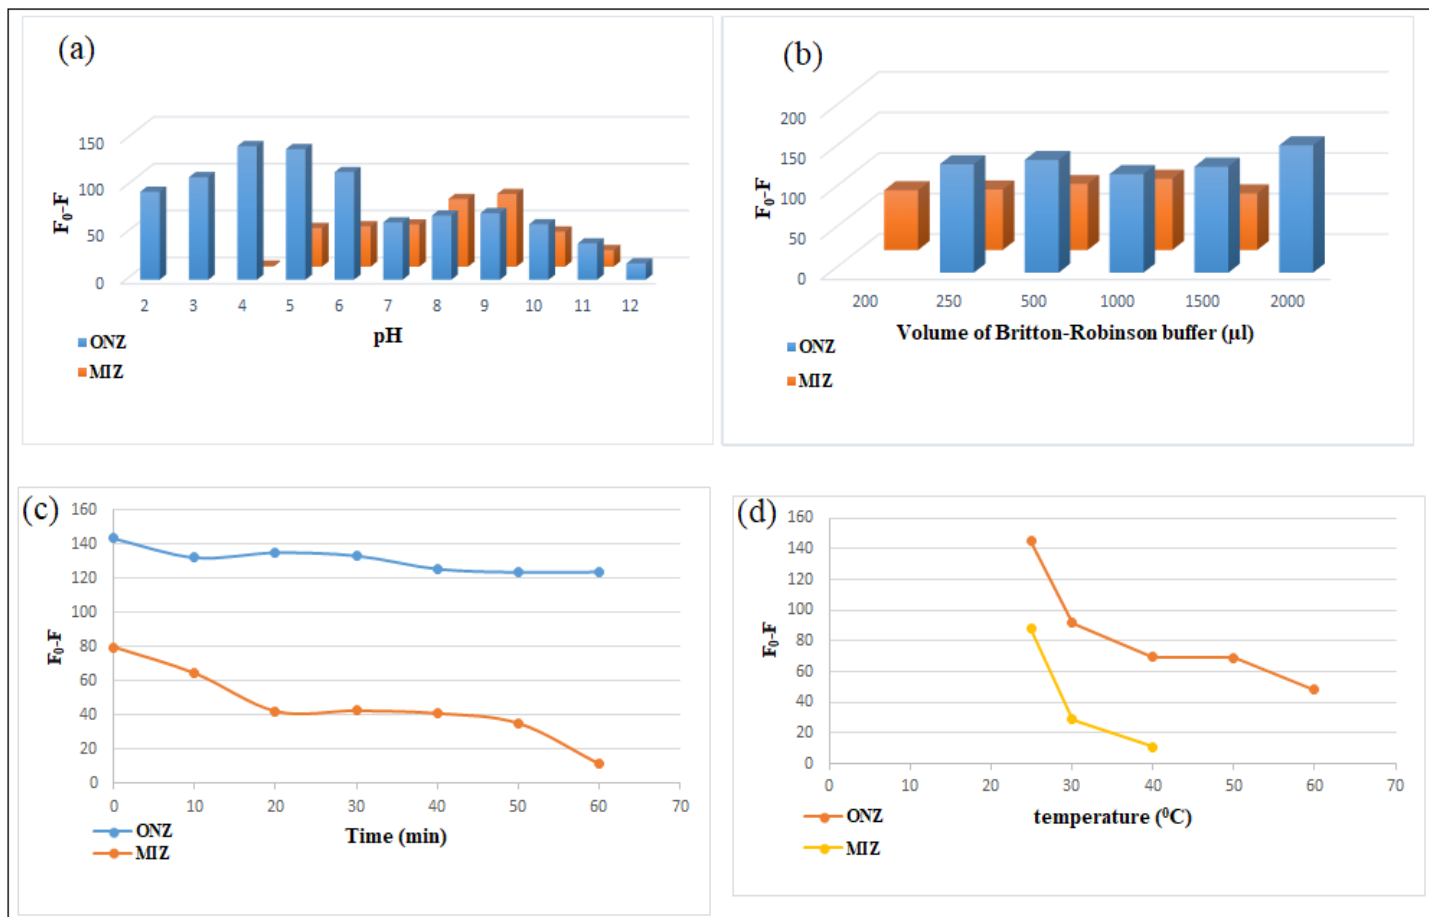

**Fig. S5**

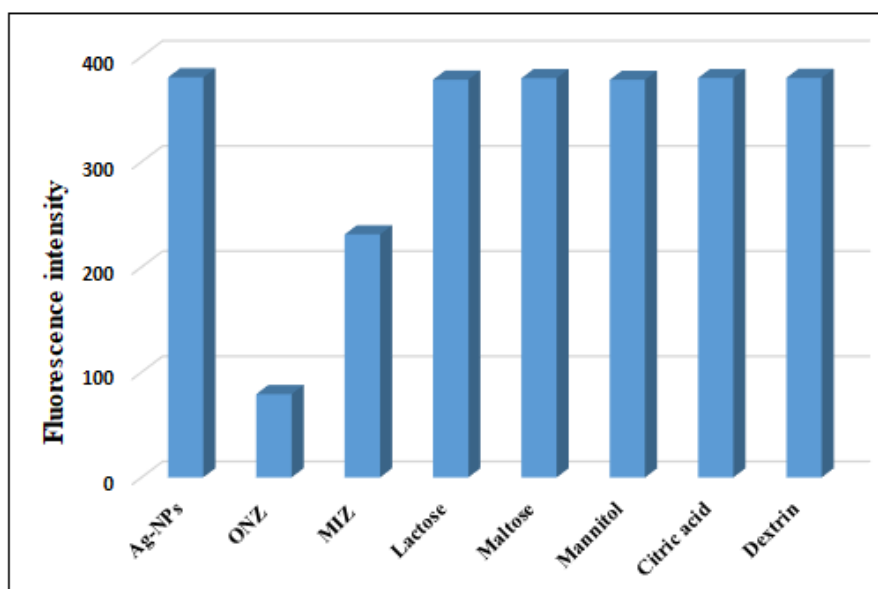

**Fig. S6**

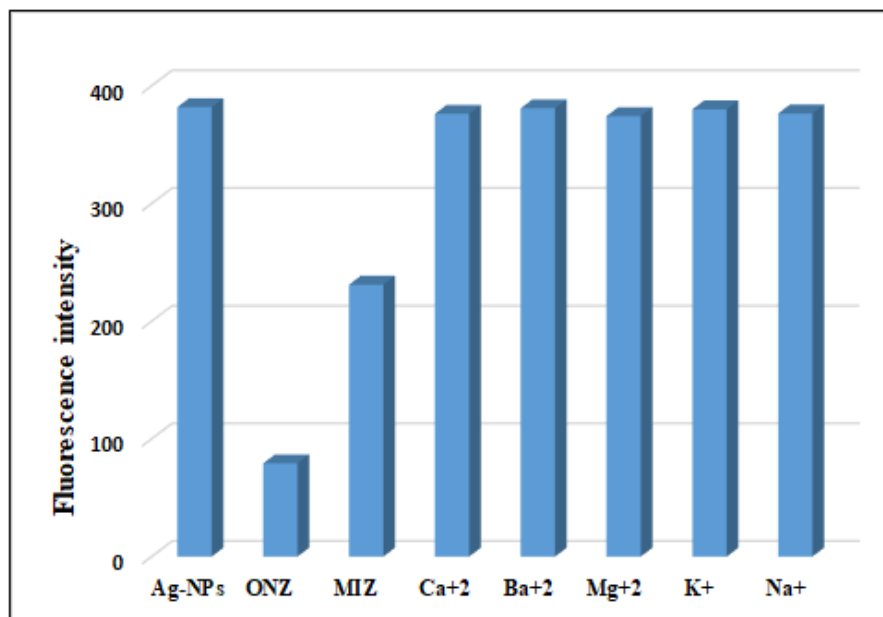

Fig. S7

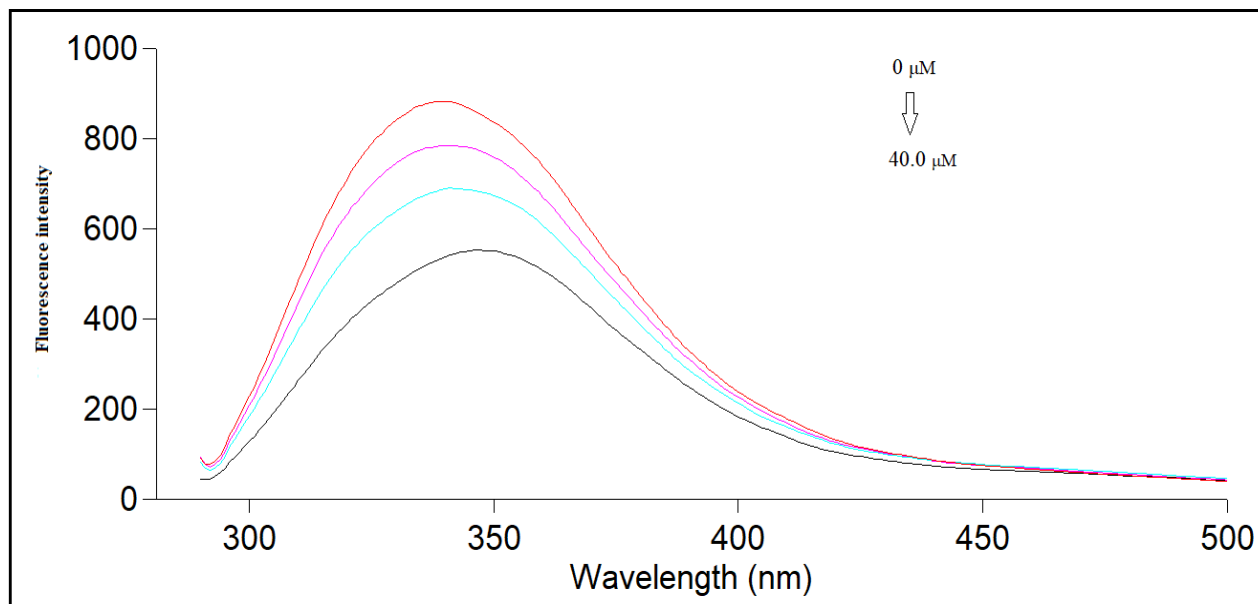

Fig. S8

**Table S1: Intra-day and inter-day precision data for the determination of the studied drugs by the proposed method**

| Analyte    | Conc. taken ( $\mu\text{M}$ ) | Intra-day precision                                  |       |         | Inter-day precision                                  |       |         |
|------------|-------------------------------|------------------------------------------------------|-------|---------|------------------------------------------------------|-------|---------|
|            |                               | Conc. found <sup>a</sup> $\pm$ S.D ( $\mu\text{M}$ ) | % RSD | % error | Conc. found <sup>a</sup> $\pm$ S.D ( $\mu\text{M}$ ) | % RSD | % error |
| <b>ONZ</b> | 20.0                          | 19.79 $\pm$ 1.03                                     | 1.04  | 0.60    | 19.85 $\pm$ 0.54                                     | 0.55  | 0.32    |
|            | 40.0                          | 40.42 $\pm$ 0.59                                     | 0.59  | 0.34    | 40.19 $\pm$ 1.11                                     | 1.10  | 0.64    |
|            | 60.0                          | 59.92 $\pm$ 0.56                                     | 0.56  | 0.32    | 60.03 $\pm$ 0.31                                     | 0.31  | 0.18    |
| <b>MIZ</b> | 40.0                          | 40.04 $\pm$ 1.12                                     | 1.11  | 0.64    | 39.79 $\pm$ 0.76                                     | 0.77  | 0.44    |
|            | 60.0                          | 60.36 $\pm$ 0.35                                     | 0.34  | 0.20    | 59.79 $\pm$ 1.11                                     | 1.11  | 0.64    |
|            | 80.0                          | 79.02 $\pm$ 0.97                                     | 0.98  | 0.57    | 80.41 $\pm$ 1.25                                     | 1.25  | 0.72    |

<sup>a</sup> Each result is the average of three separate determinations.



**Table S2: Robustness evaluation of the proposed method**

| <b>Factor</b>                                                           | <b>ONZ</b>        |             |
|-------------------------------------------------------------------------|-------------------|-------------|
| <b>1- Volume of Ag-NPs (500 <math>\mu</math>L <math>\pm</math> 5)</b>   | <b>% Recovery</b> | <b>%RSD</b> |
| 495 $\mu$ L                                                             | 101.25            | 0.78        |
| 500 $\mu$ L                                                             | 101.74            | 0.79        |
| 505 $\mu$ L                                                             | 101.42            | 0.49        |
| <b>2- Britton-Robinson buffer pH (4 <math>\pm</math> 0.2)</b>           | <b>% Recovery</b> | <b>%RSD</b> |
| pH = 3.8                                                                | 101.67            | 1.59        |
| pH = 4                                                                  | 101.74            | 0.79        |
| pH = 4.2                                                                | 102.47            | 0.71        |
| <b>3- Volume of Britton-Robinson buffer (2 mL <math>\pm</math> 0.1)</b> | <b>% Recovery</b> | <b>%RSD</b> |
| 1.9 mL                                                                  | 101.24            | 0.72        |
| 2 mL                                                                    | 101.74            | 0.79        |
| 2.1 mL                                                                  | 101.55            | 0.57        |
| <b>Factor</b>                                                           | <b>MIZ</b>        |             |
| <b>1- Volume of Ag-NPs (500 <math>\mu</math>L <math>\pm</math> 5)</b>   | <b>% Recovery</b> | <b>%RSD</b> |
| 495 $\mu$ L                                                             | 99.23             | 0.92        |
| 500 $\mu$ L                                                             | 99.02             | 1.92        |
| 505 $\mu$ L                                                             | 100.78            | 0.97        |
| <b>2- Britton-Robinson buffer (pH 9 <math>\pm</math> 0.2)</b>           | <b>% Recovery</b> | <b>%RSD</b> |
| pH = 8.8                                                                | 101.07            | 0.68        |
| pH = 9                                                                  | 99.02             | 1.92        |

|                                                              |                   |             |
|--------------------------------------------------------------|-------------------|-------------|
| <b>pH = 9.2</b>                                              | 100.63            | 0.63        |
| <b>3- Volume of Britton-Robinson<br/>buffer (1 mL ± 0.1)</b> | <b>% Recovery</b> | <b>%RSD</b> |
| <b>0.9 mL</b>                                                | 100.93            | 0.67        |
| <b>1 mL</b>                                                  | 99.02             | 1.92        |
| <b>1.1 mL</b>                                                | 100.07            | 1.36        |
